# Supplementary figures and images for: Genotypic Profile and Clinical Characteristics of CRX-Associated Retinopathy in Koreans
Source: MDPI journal article supplement (doi:10.3390/genes14051057), 2023-05-08

Mutations near or within homeobox domain

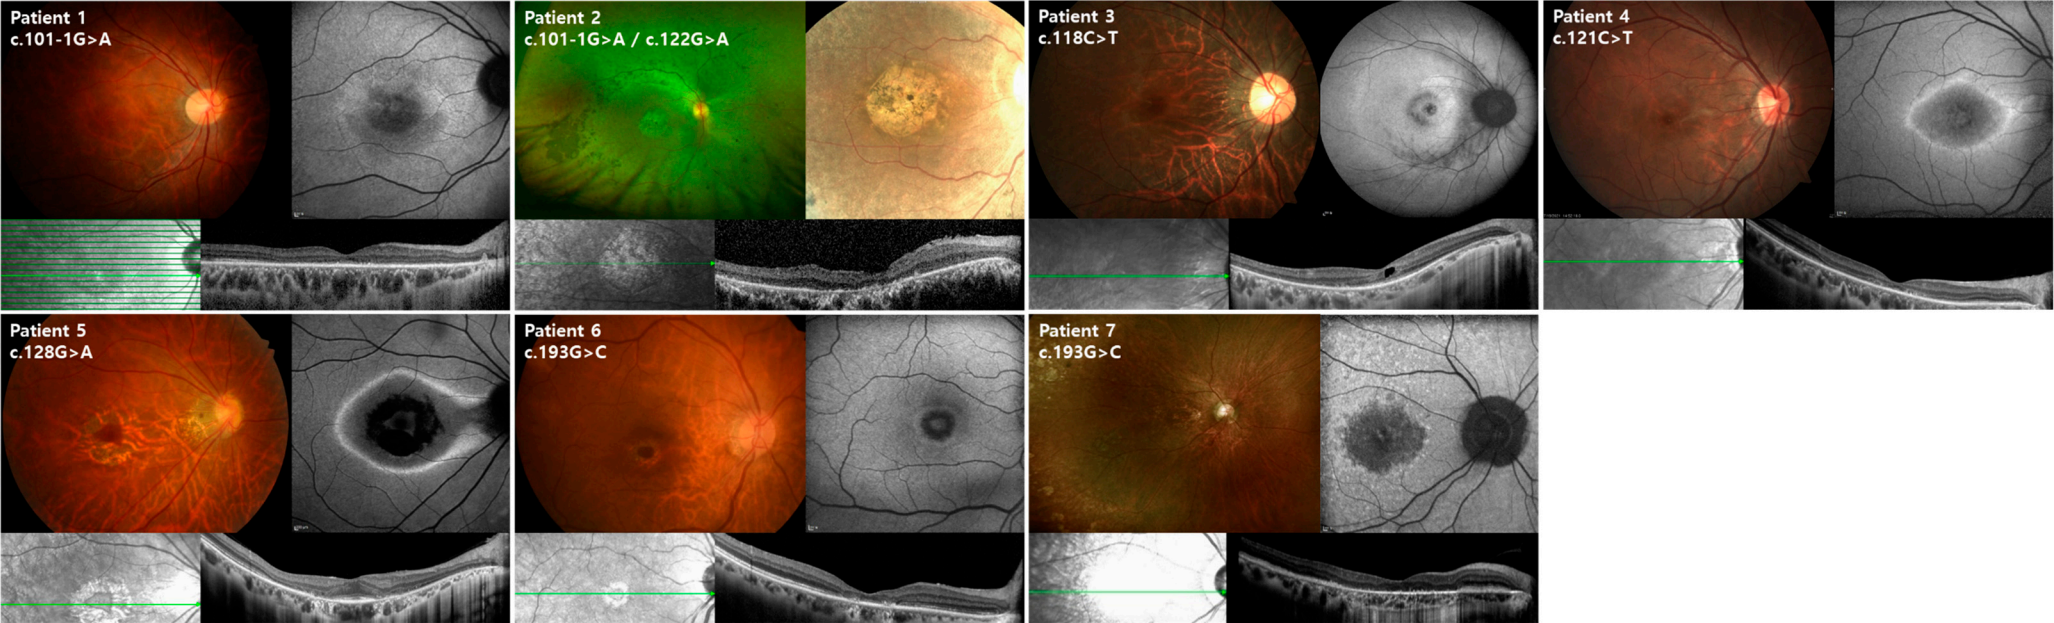

Mutations downstream of homeobox domain

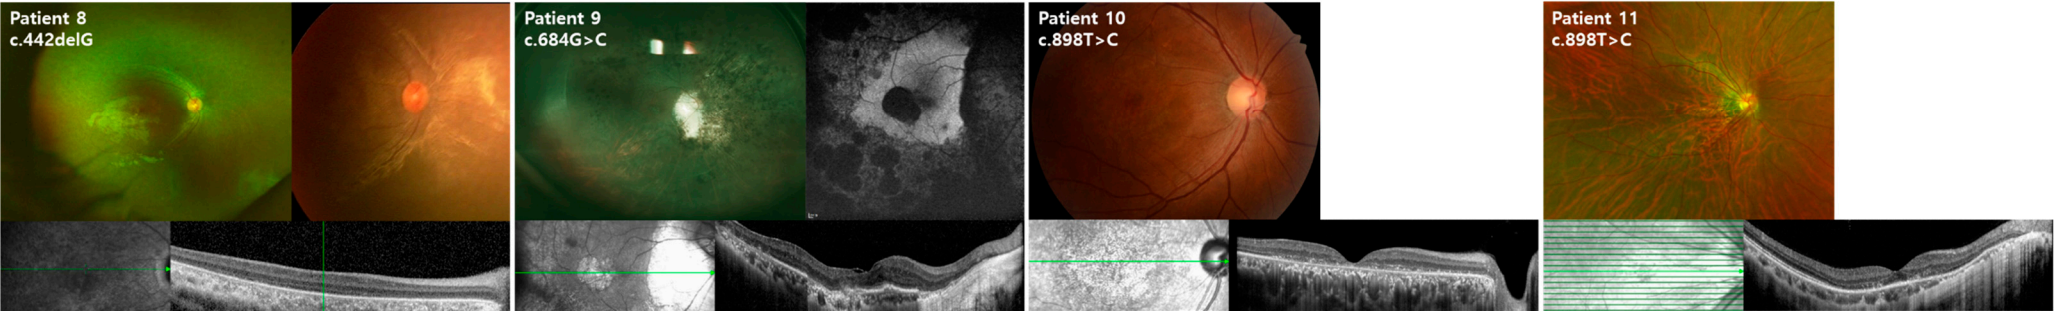

Supplement: s1 [file s1]
